# Supplementary material for: Ultrafast excited state dynamics of trans-[4-(4′-dimethylaminostyryl)] pyridine N-oxide in solution: femtosecond fluorescence up-conversion and theoretical calculations
Source: Royal Society of Chemistry journal article supplement (doi:10.1039/c3cp50527h), 2013-01-01
Supplement: c3cp50527h.pdf [file c3cp50527h.pdf]

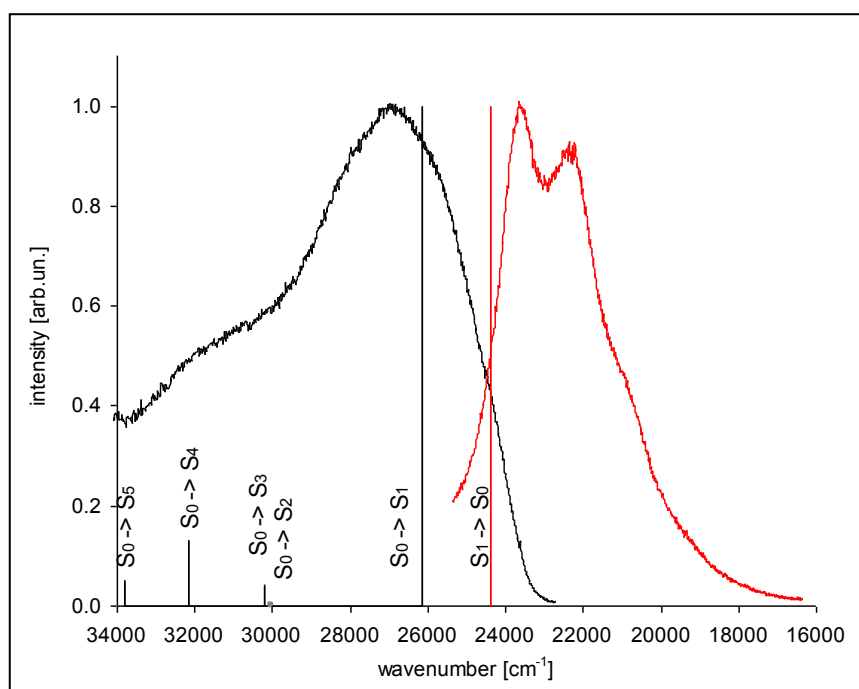

Fig.S1. Room-temperature absorption and fluorescence spectra of DPO in *iso*-octane and the TD DFT B3LYP/6-31G(d, p) calculated energies of the corresponding transitions;  $S_0 \rightarrow S_i$  (absorption) and  $S_1 \rightarrow S_0$  (emission) with  $i = 0, 1, \dots, 5$ .

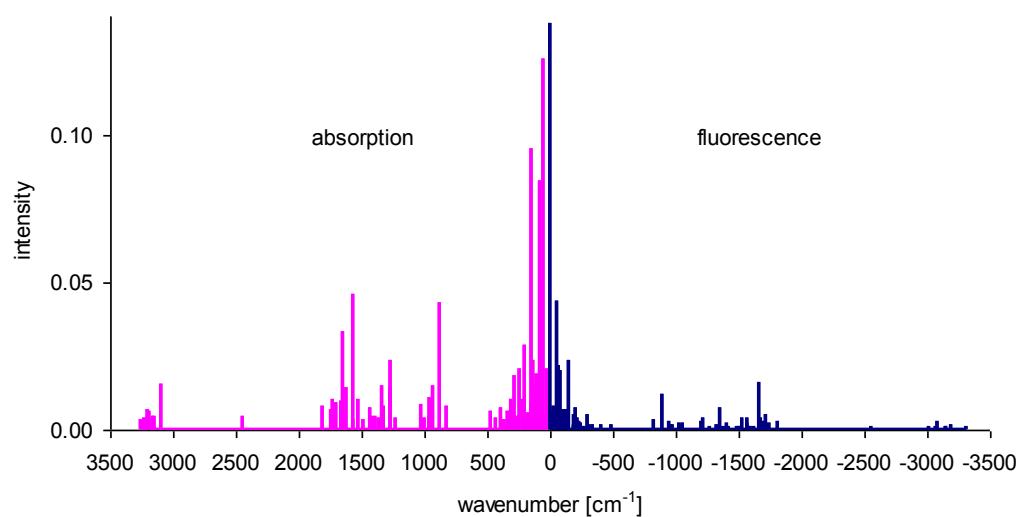

Fig.S2. The TD DFT B3LYP/6-31G(d, p) calculated lines corresponding to vibronic transitions in the absorption and fluorescence spectra of *trans*-DPO.

Table S1. The xyz coordinates and the energies of the *trans*-DPO and *cis*-DPO isomers in the DFT and TD DFT/ B3LYP/6-31G(d, p) optimized structures in the  $S_0$  and  $S_1$  states.

|   | <i>trans</i> -DPO    |         |         |                    |         |         | <i>cis</i> -DPO      |         |         |                      |         |         |
|---|----------------------|---------|---------|--------------------|---------|---------|----------------------|---------|---------|----------------------|---------|---------|
|   | $S_0$                |         |         | $S_1$              |         |         | $S_0$                |         |         | $S_1$                |         |         |
|   | E=<br>-765.903071836 |         |         | E=<br>-765.8991620 |         |         | E=<br>-765.894941237 |         |         | E=<br>-765.880072504 |         |         |
|   | x                    | y       | z       | x                  | y       | z       | x                    | y       | z       | x                    | y       | z       |
| 7 | 5.6466               | -0.0657 | 0.0160  | 5.6225             | -0.0485 | 0.0003  | -4.1894              | -1.3223 | -0.2360 | -3.7769              | -1.4634 | -0.2508 |
| 6 | 4.8097               | -1.1571 | 0.0424  | 4.8018             | -1.1495 | 0.0017  | -2.9457              | -1.2704 | -0.8206 | -2.5793              | -1.2339 | -0.8650 |
| 6 | 3.4399               | -1.0227 | 0.0330  | 3.4324             | -1.0419 | 0.0014  | -2.1237              | -0.1731 | -0.6848 | -1.9144              | -0.0286 | -0.7551 |
| 6 | 2.8205               | 0.2452  | -0.0048 | 2.7917             | 0.2460  | -0.0004 | -2.5181              | 0.9558  | 0.0621  | -2.4707              | 1.0460  | 0.0342  |
| 6 | 3.7038               | 1.3427  | -0.0302 | 3.6768             | 1.3611  | -0.0016 | -3.8086              | 0.8869  | 0.6213  | -3.7577              | 0.7915  | 0.5872  |
| 6 | 5.0733               | 1.1801  | -0.0200 | 5.0378             | 1.2132  | -0.0013 | -4.6090              | -0.2279 | 0.4773  | -4.3791              | -0.4193 | 0.4526  |
| 6 | 1.3818               | 0.4655  | -0.0173 | 1.3816             | 0.4301  | -0.0008 | -1.7323              | 2.1850  | 0.1957  | -1.8049              | 2.2799  | 0.2552  |
| 6 | 0.4173               | -0.4834 | -0.0117 | 0.4140             | -0.5704 | -0.0004 | -0.3975              | 2.4053  | 0.1363  | -0.4503              | 2.5661  | 0.0287  |
| 6 | -1.0258              | -0.2837 | -0.0214 | -1.0051            | -0.3480 | -0.0002 | 0.7438               | 1.4855  | 0.0900  | 0.6423               | 1.6473  | 0.0722  |
| 6 | -1.8794              | -1.4025 | -0.0365 | -1.9009            | -1.4542 | -0.0017 | 1.9466               | 1.9090  | -0.5044 | 1.9118               | 2.0144  | -0.4568 |
| 6 | -3.2616              | -1.2851 | -0.0458 | -3.2719            | -1.3008 | -0.0016 | 3.0770               | 1.1050  | -0.5492 | 2.9856               | 1.1532  | -0.4639 |
| 6 | -3.8814              | -0.0140 | -0.0473 | -3.8630            | -0.0057 | -0.0001 | 3.0720               | -0.1878 | 0.0245  | 2.8770               | -0.1625 | 0.0886  |
| 6 | -3.0286              | 1.1179  | -0.0198 | -2.9857            | 1.1092  | 0.0017  | 1.8801               | -0.5999 | 0.6688  | 1.6462               | -0.5194 | 0.6855  |
| 6 | -1.6507              | 0.9796  | -0.0104 | -1.6130            | 0.9445  | 0.0017  | 0.7572               | 0.2139  | 0.6935  | 0.5644               | 0.3467  | 0.6852  |
| 7 | -5.2585              | 0.1212  | -0.0798 | -5.2366            | 0.1547  | -0.0003 | 4.1833               | -1.0128 | -0.0365 | 3.9451               | -1.0335 | 0.0509  |
| 6 | -5.8595              | 1.4330  | 0.0926  | -5.8168            | 1.4862  | 0.0000  | 4.2046               | -2.2476 | 0.7296  | 3.8254               | -2.3538 | 0.6471  |
| 6 | -6.0994              | -1.0566 | 0.0486  | -6.1120            | -1.0050 | 0.0007  | 5.4424               | -0.4844 | -0.5334 | 5.2348               | -0.6040 | -0.4662 |
| 8 | 6.9157               | -0.2116 | 0.0254  | 6.9051             | -0.1662 | 0.0004  | -4.9323              | -2.3527 | -0.3633 | -4.3735              | -2.5983 | -0.3314 |
| 1 | 5.3344               | -2.1023 | 0.0713  | 5.3424             | -2.0872 | 0.0030  | -2.6974              | -2.1576 | -1.3870 | -2.2230              | -2.0757 | -1.4446 |
| 1 | 2.8490               | -1.9316 | 0.0572  | 2.8487             | -1.9549 | 0.0028  | -1.1617              | -0.1940 | -1.1823 | -1.0291              | 0.1330  | -1.3544 |
| 1 | 3.3118               | 2.3549  | -0.0593 | 3.2697             | 2.3689  | -0.0029 | -4.1996              | 1.7239  | 1.1919  | -4.2574              | 1.5680  | 1.1601  |
| 1 | 5.7906               | 1.9892  | -0.0387 | 5.7553             | 2.0216  | -0.0022 | -5.6004              | -0.3344 | 0.8957  | -5.3447              | -0.6796 | 0.8623  |
| 1 | 1.0885               | 1.5135  | -0.0347 | 1.0511             | 1.4669  | -0.0017 | -2.3464              | 3.0729  | 0.3416  | -2.4346              | 3.1080  | 0.5825  |
| 1 | 0.7210               | -1.5296 | -0.0014 | 0.7304             | -1.6097 | -0.0008 | -0.1069              | 3.4559  | 0.1454  | -0.1846              | 3.6110  | -0.1269 |
| 1 | -1.4420              | -2.3982 | -0.0375 | -1.4849            | -2.4581 | -0.0030 | 1.9944               | 2.8997  | -0.9503 | 2.0244               | 3.0028  | -0.8949 |
| 1 | -3.8600              | -2.1874 | -0.0502 | -3.8957            | -2.1863 | -0.0030 | 3.9698               | 1.4906  | -1.0254 | 3.9190               | 1.4842  | -0.9021 |
| 1 | -3.4478              | 2.1162  | -0.0032 | -3.3856            | 2.1160  | 0.0034  | 1.8325               | -1.5590 | 1.1693  | 1.5363               | -1.4791 | 1.1755  |
| 1 | -1.0466              | 1.8816  | 0.0121  | -0.9887            | 1.8313  | 0.0036  | -0.1246              | -0.1370 | 1.2191  | -0.3295              | 0.0760  | 1.2308  |
| 1 | -6.9439              | 1.3416  | 0.0213  | -6.9035            | 1.4067  | -0.0031 | 5.1354               | -2.7786 | 0.5257  | 4.7363               | -2.9206 | 0.4550  |
| 1 | -5.5346              | 2.1250  | -0.6932 | -5.5127            | 2.0594  | -0.8863 | 3.3792               | -2.9064 | 0.4373  | 2.9822               | -2.9061 | 0.2149  |
| 1 | -5.6171              | 1.8865  | 1.0655  | -5.5176            | 2.0574  | 0.8894  | 4.1363               | -2.0791 | 1.8152  | 3.6741               | -2.3032 | 1.7348  |
| 1 | -7.1459              | -0.7597 | -0.0288 | -7.1496            | -0.6724 | 0.0019  | 6.1869               | -1.2817 | -0.5399 | 5.9311               | -1.4416 | -0.4300 |
| 1 | -5.9600              | -1.5758 | 1.0089  | -5.9532            | -1.6315 | 0.8886  | 5.8308               | 0.3431  | 0.0800  | 5.6624               | 0.2206  | 0.1207  |
| 1 | -5.8993              | -1.7746 | -0.7552 | -5.9553            | -1.6315 | -0.8876 | 5.3386               | -0.1223 | -1.5625 | 5.1593               | -0.2749 | -1.5100 |

Table S2. Comparison of the chosen bondlengths in various optimized structures of the *trans*-DPO. The atom numeration on the top of the Table; *trans*-DPO- $S_0$ - ground state optimization;

*trans*-DPO- $S_1$ - excited state optimization; *trans*-DPO- $S_0$  in ACN- ground state optimization in acetonitrile; *trans* – DPO- $S_0$  cryst- crystallographic experimental data for DPO; *trans*- DPO-MeOH complex-  $S_0$  - ground state optimization of DPO-MeOH complex.

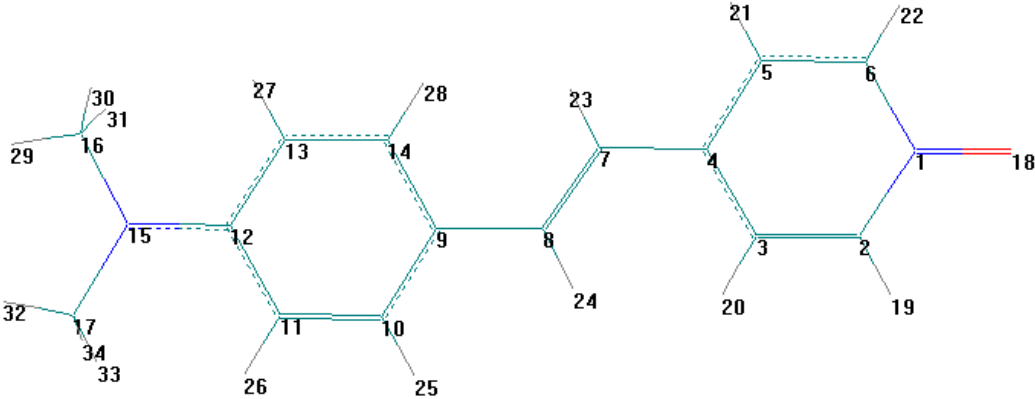

|         | <i>trans</i> -DPO- $S_0$ | <i>trans</i> – DPO- $S_0$ cryst[32(c)] | <i>trans</i> -DPO- $S_0$ in ACN | <i>trans</i> - DPO-MeOH complex- $S_0$ | <i>trans</i> -DPO- $S_1$ |
|---------|--------------------------|----------------------------------------|---------------------------------|----------------------------------------|--------------------------|
| N1-O18  | 1.278                    | 1.301                                  | 1.292                           | 1.296                                  | 1.288                    |
| N1-C6   | 1.372                    | 1.394                                  | 1.368                           | 1.368                                  | 1.391                    |
| C5-C4   | 1.409                    | 1.400                                  | 1.410                           | 1.409                                  | 1.424                    |
| C3-C4   | 1.412                    | 1.401                                  | 1.413                           | 1.412                                  | 1.438                    |
| C4-C7   | 1.455                    | 1.447                                  | 1.455                           | 1.455                                  | 1.422                    |
| C7-C8   | 1.354                    | 1.339                                  | 1.356                           | 1.354                                  | 1.392                    |
| C8-C9   | 1.457                    | 1.447                                  | 1.456                           | 1.456                                  | 1.436                    |
| C9-C14  | 1.410                    | 1.402                                  | 1.411                           | 1.410                                  | 1.428                    |
| C9-C10  | 1.407                    | 1.402                                  | 1.410                           | 1.407                                  | 1.423                    |
| C11-C12 | 1.414                    | 1.416                                  | 1.417                           | 1.415                                  | 1.423                    |
| C13-C12 | 1.417                    | 1.401                                  | 1.421                           | 1.418                                  | 1.419                    |
| C12-N15 | 1.384                    | 1.370                                  | 1.375                           | 1.382                                  | 1.383                    |

Table S3. The vibration frequencies of *trans*-DPO structures optimized in the  $S_0$  and  $S_1$  state. The bold numbers indicate the vibrations with the large FC factor both in the absorption and emission.

|                       |                       |
|-----------------------|-----------------------|
| $S_0$                 | $S_1$                 |
| zero-point correction | zero-point correction |
| frequency             | frequency             |
| 0.2804 H              | 0.2767 H              |
| red.mass              | red.mass              |

|    | hν           | μ             | hν           | μ             |
|----|--------------|---------------|--------------|---------------|
| 1  | 13.8         | 3.3347        | 20.8         | 3.4270        |
| 2  | <b>30.2</b>  | <b>5.2854</b> | 26.3         | 5.1340        |
| 3  | <b>52.6</b>  | <b>5.2821</b> | <b>53.1</b>  | <b>5.3114</b> |
| 4  | <b>61.9</b>  | <b>4.0067</b> | 56.3         | 2.4709        |
| 5  | 69.7         | 2.5762        | <b>64.3</b>  | <b>4.5666</b> |
| 6  | <b>77.8</b>  | <b>2.3329</b> | 85.5         | 2.1246        |
| 7  | 141.5        | 1.8435        | 132.8        | 2.5895        |
| 8  | <b>154.4</b> | <b>4.6070</b> | <b>153.1</b> | <b>5.8184</b> |
| 9  | 179.4        | 3.3908        | 197.4        | 1.8213        |
| 10 | 187.7        | 1.6048        | 203.2        | 1.4273        |
| 11 | 218.4        | 2.3984        | 206.2        | 4.7742        |
| 12 | 238.7        | 2.1378        | 239.9        | 2.0529        |
| 13 | 290.9        | 3.3732        | 285.3        | 4.0659        |
| 14 | 341.8        | 3.6596        | 324.7        | 3.2102        |
| 15 | 398.0        | 4.7693        | 358.5        | 4.3983        |
| 16 | 403.1        | 3.7214        | 395.2        | 4.1212        |
| 17 | 425.9        | 3.2365        | 404.5        | 3.1177        |
| 18 | 429.7        | 3.3639        | 419.8        | 3.2312        |
| 19 | 432.9        | 4.9430        | 422.5        | 5.2066        |
| 20 | 486.6        | 4.3649        | 460.0        | 2.3392        |
| 21 | 512.9        | 3.2923        | 478.9        | 4.4712        |
| 22 | 515.5        | 3.9082        | 509.0        | 4.3775        |
| 23 | 519.9        | 2.9566        | 510.0        | 3.8686        |
| 24 | 549.9        | 2.2668        | 516.4        | 2.2287        |
| 25 | 593.2        | 5.0335        | 584.5        | 4.8376        |
| 26 | 654.9        | 7.1342        | 640.4        | 7.1971        |
| 27 | 676.8        | 7.0252        | 664.8        | 4.1474        |
| 28 | 715.1        | 3.7023        | 664.8        | 6.0842        |
| 29 | 738.3        | 4.4243        | 711.3        | 3.5989        |
| 30 | 740.5        | 4.6445        | 728.6        | 4.7564        |
| 31 | 810.7        | 1.2785        | 738.8        | 1.5361        |
| 32 | 819.1        | 1.4618        | 756.3        | 1.7811        |
| 33 | 824.2        | 1.4683        | 777.0        | 1.3639        |
| 34 | 830.2        | 5.0703        | 778.4        | 1.3590        |
| 35 | 843.6        | 1.7370        | 819.2        | 2.1417        |
| 36 | 866.0        | 5.6581        | 819.4        | 3.5230        |
| 37 | 878.6        | 1.9813        | 839.6        | 6.1533        |
| 38 | <b>896.3</b> | <b>4.5493</b> | 853.0        | 1.2741        |
| 39 | 938.5        | 1.2811        | <b>875.1</b> | <b>4.3063</b> |
| 40 | 943.0        | 1.3176        | 897.4        | 1.2529        |
| 41 | 947.5        | 1.3132        | 916.8        | 1.2976        |
| 42 | 950.3        | 1.3481        | 928.6        | 1.2907        |
| 43 | 970.1        | 3.1496        | 946.6        | 1.3021        |
| 44 | 997.8        | 1.1261        | 958.8        | 3.3074        |
| 45 | 1021.2       | 2.7494        | 1001.5       | 2.7322        |
| 46 | 1042.0       | 2.6463        | 1011.4       | 2.9470        |
| 47 | 1085.4       | 1.5158        | 1084.8       | 1.5351        |
| 48 | 1117.5       | 1.4837        | 1107.0       | 1.5137        |
| 49 | 1143.4       | 1.3199        | 1133.7       | 1.2345        |
| 50 | 1146.8       | 1.2433        | 1135.9       | 1.3192        |

|    |               |               |               |               |
|----|---------------|---------------|---------------|---------------|
| 51 | 1162.9        | 1.5033        | 1157.0        | 1.6049        |
| 52 | 1200.1        | 1.1893        | 1181.5        | 1.3395        |
| 53 | 1202.2        | 1.6944        | 1182.0        | 1.5935        |
| 54 | 1218.1        | 1.4489        | 1215.0        | 1.6402        |
| 55 | 1238.2        | 1.6960        | 1232.3        | 1.6540        |
| 56 | 1257.7        | 1.7985        | 1251.8        | 1.7809        |
| 57 | 1280.5        | 3.2451        | 1264.0        | 2.2328        |
| 58 | 1285.1        | 2.6007        | <b>1270.4</b> | <b>3.0944</b> |
| 59 | 1322.1        | 2.0253        | 1275.8        | 2.0338        |
| 60 | 1337.8        | 1.6745        | 1317.6        | 2.3263        |
| 61 | <b>1356.7</b> | <b>1.6068</b> | 1332.2        | 3.9506        |
| 62 | 1367.3        | 3.4573        | 1338.2        | 1.8746        |
| 63 | 1373.3        | 1.8868        | 1371.4        | 2.2953        |
| 64 | 1383.9        | 2.7033        | 1377.0        | 2.1915        |
| 65 | 1394.8        | 3.3239        | 1393.1        | 3.6602        |
| 66 | 1455.8        | 1.2317        | 1431.2        | 2.6398        |
| 67 | 1482.4        | 2.4845        | 1453.1        | 1.2107        |
| 68 | 1493.4        | 1.0480        | 1476.8        | 2.1926        |
| 69 | 1497.8        | 3.0575        | 1484.8        | 1.0387        |
| 70 | 1500.1        | 1.1448        | 1490.3        | 1.2842        |
| 71 | 1502.4        | 1.1533        | 1495.3        | 1.0454        |
| 72 | 1524.9        | 2.5548        | 1497.7        | 2.3817        |
| 73 | 1528.5        | 1.1029        | 1520.8        | 2.2981        |
| 74 | 1543.3        | 1.0863        | 1524.9        | 1.6068        |
| 75 | 1563.8        | 5.6825        | 1534.0        | 2.9553        |
| 76 | 1571.7        | 2.6615        | 1537.5        | 1.3439        |
| 77 | 1598.0        | 5.6875        | 1541.6        | 1.6442        |
| 78 | <b>1658.7</b> | <b>4.8860</b> | <b>1572.2</b> | <b>2.9992</b> |
| 79 | 1682.3        | 5.5662        | 1642.0        | 5.2477        |
| 80 | 1696.2        | 5.3035        | <b>1654.1</b> | <b>5.5125</b> |
| 81 | 2995.1        | 1.0467        | 3005.0        | 1.0377        |
| 82 | 3002.8        | 1.0507        | 3014.2        | 1.0408        |
| 83 | 3062.8        | 1.0926        | 3052.1        | 1.1036        |
| 84 | 3064.1        | 1.0942        | 3055.1        | 1.1043        |
| 85 | 3139.2        | 1.0979        | 3149.8        | 1.0978        |
| 86 | 3145.9        | 1.0888        | 3159.3        | 1.0864        |
| 87 | 3150.5        | 1.0954        | 3162.6        | 1.0951        |
| 88 | 3159.4        | 1.0864        | 3178.1        | 1.0864        |
| 89 | 3174.1        | 1.0891        | 3184.0        | 1.0884        |
| 90 | 3189.1        | 1.0880        | 3185.0        | 1.0893        |
| 91 | 3198.3        | 1.0902        | 3201.3        | 1.0865        |
| 92 | 3210.0        | 1.0896        | 3213.6        | 1.0867        |
| 93 | 3226.3        | 1.0911        | 3224.8        | 1.0920        |
| 94 | 3227.9        | 1.0908        | 3226.7        | 1.0912        |
| 95 | 3259.8        | 1.0938        | 3249.9        | 1.0945        |
| 96 | 3261.5        | 1.0947        | 3263.8        | 1.0930        |

Table S4. Comparison of the energy and oscillator strength for the  $S_0 \rightarrow S_i$  electronic transitions in *trans*-DPO and *trans*-DPO...MeOH complex.

|                | <i>trans</i> -DPO                                      |                        | <i>trans</i> -DPO...MeOH                               |                        |
|----------------|--------------------------------------------------------|------------------------|--------------------------------------------------------|------------------------|
|                | $\Delta E(S_0 \rightarrow S_i)$<br>[cm <sup>-1</sup> ] | Oscillator<br>strength | $\Delta E(S_0 \rightarrow S_i)$<br>[cm <sup>-1</sup> ] | Oscillator<br>strength |
| S <sub>1</sub> | 26145                                                  | 1.1818                 | 25661                                                  | 1.2048                 |
| S <sub>2</sub> | 30016                                                  | 0.0000                 | 30565                                                  | 0.0196                 |
| S <sub>3</sub> | 30209                                                  | 0.0405                 | 31376                                                  | 0.0005                 |
| S <sub>4</sub> | 32161                                                  | 0.1322                 | 32517                                                  | 0.1897                 |
| S <sub>5</sub> | 33820                                                  | 0.0494                 | 33509                                                  | 0.0011                 |
| S <sub>6</sub> | 37404                                                  | 0.0029                 | 34146                                                  | 0.0414                 |
| S <sub>7</sub> | 38927                                                  | 0.0209                 | 37528                                                  | 0.0030                 |
| S <sub>8</sub> | 39410                                                  | 0.0000                 | 38499                                                  | 0.0328                 |
| S <sub>9</sub> | 39591                                                  | 0.0120                 | 39530                                                  | 0.0118                 |

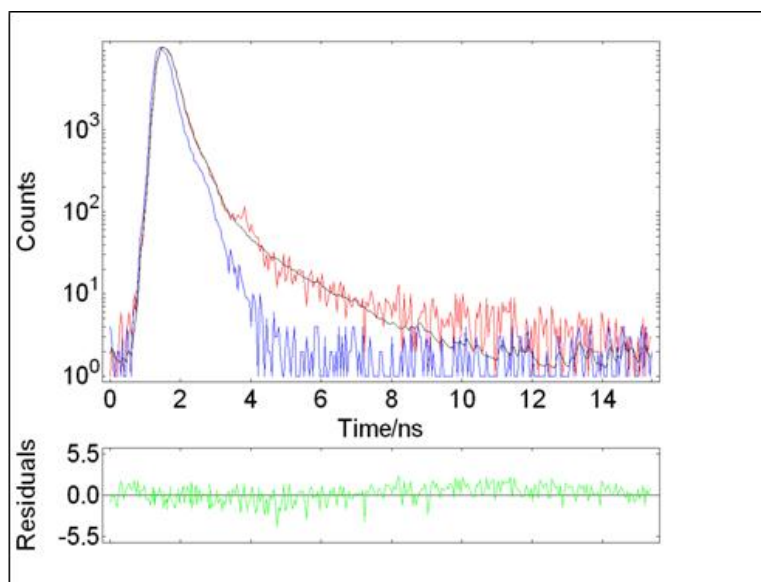

**Fig. S3.** The fluorescence decay curve of *trans*-DPO in 1,4-dioxane (exc = 375 nm, em = 464 nm).

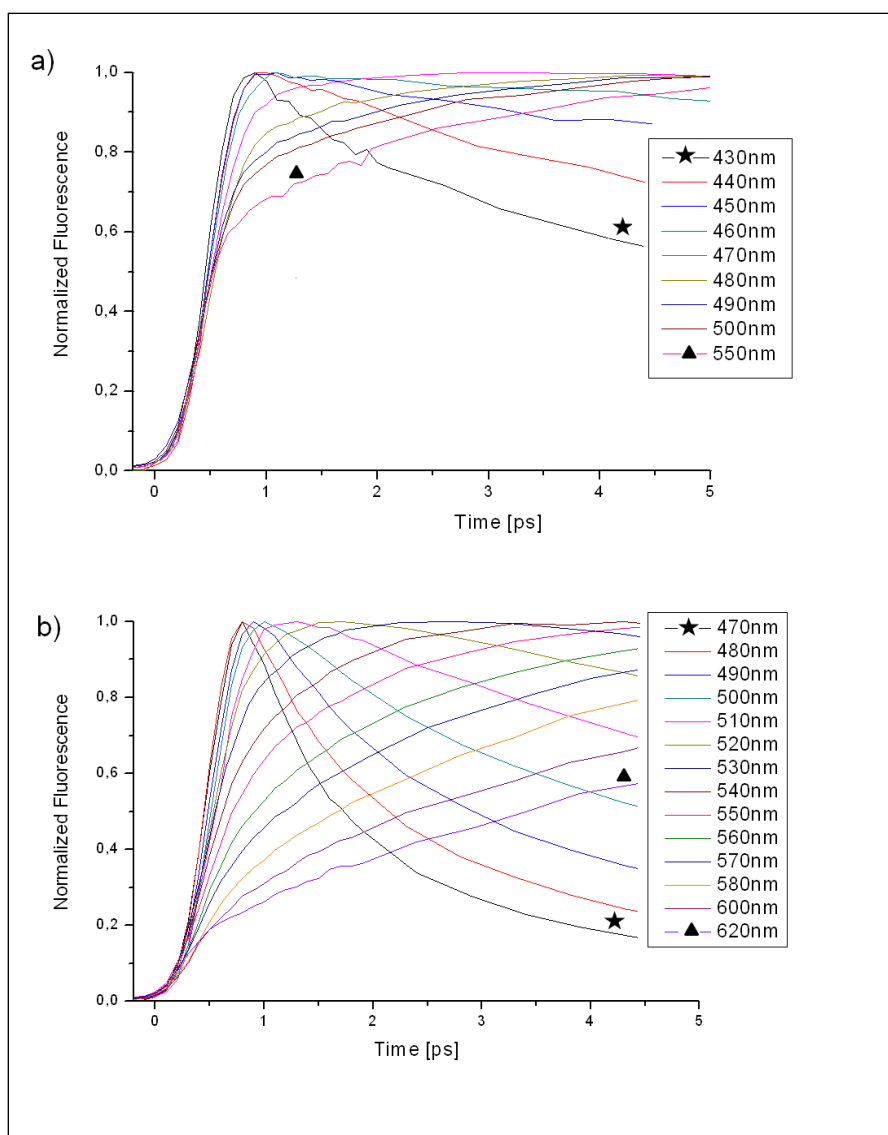

Fig. S4. The up-conversion signals of *trans*-DPO in (a) dioxane , (b) methanol, probed at different wavelengths.
